## MicroRNA-367 promotes progression of hepatocellular carcinoma through *PTEN/PI3K/AKT* signaling pathway

Zhihua Wang, Yu Luo \*

Department of Oncology, Hunan Provincial Tumor Hospital, Changsha, Hunan, China.

\* Address correspondence to:

Yu Luo, Department of Oncology, Hunan Provincial Tumor Hospital, Changsha, Hunan, China.

Email: [wertyjkx@163.com](mailto:wertyjkx@163.com).

## Abstract

The study aimed to investigate the functional roles of micorRNA (miR)-367 in progression of hepatocellular carcinoma (HCC), as well as its regulation on PI3K/AKT pathway. The relative expression of *miR-367* in HCC tissues and cell line was detected using quantitative real-time polymerase chain reaction (qRT-PCR) method. Chi-square test was applied to analyze the relationship between *miR-367* expression and clinical characterizes of HCC patients. The influences of *miR-367* expression on cell proliferation, migration and invasion were analyzed using MTT and transwell assays respectively. Western blot assay was performed to for protein analysis. HCC tissues and cell lines exhibited significant up-regulation of *miR-367*. Moreover, the elevated expression of *miR-367* was positively correlated with tumor size ( $P=0.005$ ), metastasis ( $P=0.004$ ) and TNM stage ( $P<0.001$ ). Knockdown of *miR-367* expression could inhibit cell proliferation, migration and invasion in vitro. While, enhanced *miR-367* expression exhibited opposite effects. Besides, inhibition of *miR-367* might enhance *PTEN* expression, reduce the levels of p-GSK3 $\beta$  and p-AKT. *PTEN* might be a target of *miR-367* in HCC. The inhibition of *PTEN* could reverse the anti-tumor action caused by the knockdown of *miR-367*. *MiR-367* serves as an oncogene in HCC through activating the PI3K/AKT pathway by targeting *PTEN*.

**Key words:** Hepatocellular carcinoma; *MiR-367*; *PTEN*; PI3K/AKT pathway

## Introduction

Hepatocellular carcinoma (HCC) is a prevalent malignant disease, with increasing incidence rate around the world [1]. The cancer is characterized by silent growth at early stages, and rapid metastasis, thus most of the patients present advanced stages when initial diagnosis, leading to poor prognosis [2, 3]. Although there are various available treatments for HCC, the clinical outcomes of the patients still remain dismal [4]. The five-year survival rate of HCC patients is less than 20% [5]. HCC is a heterogeneous disease which is regulated by the interactions of environmental and genetic factors [6]. A variety of risk factors have been confirmed for HCC, including cirrhosis, hepatitis virus infection, alcohol abuse, obesity, liver disease, smoking, and type 2 diabetes [7]. However, the key factors to drive the progression of HCC are still unconfirmed.

Growing evidences have demonstrated that tumor genetics play a key role in development and progression of HCC [8]. The dysregulation of the genes which are involved in cell cycle, growth, motility, apoptosis, may contribute to the progression of HCC [9]. MicroRNAs, a group of endogenous RNAs, have no protein encoding ability, but they can take part in gene regulation through binding to the 3'untranslated regions (UTR) of their target mRNAs [10, 11]. MiRNAs take part in various biological processes, such as development, differentiation, cell cycle, tumorigenesis [12, 13]. The dysregulation of miRNAs has been frequently observed in cancer cells, revealing their close association with tumorigenesis. The expression profiles of miRNAs are significantly correlated with cancer development and progression, which may be used for cancer monitoring and therapy [14]. To explore the function of miRNAs may provide a new insight into the etiology of cancer.

MicroRNA-367 (*MiR-367*) is a common member of miRNA family, and its dysregulation has been reported in several human cancers, including non-small cell lung cancer [15], uveal melanoma [16], osteosarcoma [17], renal cell carcinoma [18], etc. In HCC, Wang et al. [19] reported that the expression of *miR-367* was up-regulated, and its elevated expression predicted poor prognosis for the patients. However, the molecular mechanisms of *miR-367* in HCC had been rarely reported.

In current study, we investigated the expression of *miR-367* in HCC, as well as its clinical significance. In addition, the cell experiments were designed to explore the molecular mechanisms underlying the function of *miR-367* in HCC.

## Materials and methods

### *Study subjects and tissue collection*

A total of 126 HCC patients were recruited from Hunan Provincial Tumor Hospital. The surgical HCC tissues and adjacent normal tissues were collected from each patient. None of the patients had received any preoperative treatments, such as chemotherapy, radiotherapy, or immune treatments. The tissue specimens were immediately frozen in lipid nitrogen, and kept at -80°C. The baseline characteristics of the patients, such as age, gender, smoking, tumor size, lymph node metastasis and TNM stage were collected from their medical records.

The current study was approved by the Ethic Committee of the hospital. The written informed consents were obtained from all the subjects before tissue collection.

### *Cell line and culture*

Human HCC cell line HepG2 (code: SCSP-510) and human immortalized hepatocytes THLE-3 (code: GNHu40) cell lines were cultured in RPMI-1640 medium with supplement of 10% fetal bovine serum (FBS; Gibco; Thermo Fisher Scientific, Inc., Waltham, MA, USA), 100 U/mL penicillin and 100 mg/mL streptomycin (Life Technologies; Thermo Fisher Scientific, Inc., Waltham, MA, USA). The cells were cultured in an incubator with 5% CO<sub>2</sub> at 37°C. Both of the cells lines were bought from the Cell Bank of the Chinese Academic of Science (CBP600232; Shanghai, China).

### *RNA extraction and quantitative analysis*

Total RNA was extracted from HCC tissue and cell specimens using Trizol reagent (Invitrogen, Thermo Fisher Scientific, Inc.) following the instruction of the manufacture. Then, the first strand of cDNA was synthesized by the reverse transcription which was carried out by PrimerScript RT reagent kit (Takara, Dalian, China). The relative expression of the target genes was estimated through quantitative real-time polymerase chain reaction (qRT-PCR). The specific primer sequences were as follows:

|                             |                               |                              |                             |
|-----------------------------|-------------------------------|------------------------------|-----------------------------|
| <i>U6</i>                   | forward:                      | 5'-CTCGCTTCGGCAGCACA-3',     | reverse:                    |
| 5'-AACGCTTCACGAATTTGCGT-3'; | <i>miR-367</i>                | forward:                     | 5'-TTCTCCGAAGTTGTACGTTT-3', |
| reverse:                    | 5'-ACGTGACACGTTTCGGAGAATT-3'; | <i>GAPDH</i>                 | forward:                    |
| 5'-TGCACCACCAACTGCTTAGC-3', | reverse:                      | 5'-GGCATGGACTGTGGTCATGAG-3'; | <i>PTEN</i> :               |

forward, 5'-TGGATTCGACTTAGACTTGACCT-3', reverse, 5'-GGTGGGTTATGGTCTTCAAAAGG-3'. *U6* acted as internal reference for miRNA, while *GAPDH* was employed as internal control for mRNA. The results were calculated by  $2^{-\Delta\Delta C_t}$  method. Each test was repeated in triplicate.

### *Cell transfection*

HCC cell line HepG2 at logarithmic phase were harvested from cell transfection. *MiR-367* mimic, *miR-367* inhibitor, si-*PTEN*, over-expression *PTEN*, as well as the corresponding negative controls were constructed by HANBIO company (Shanghai, China; supplementary Table 1). The collected cells were digested using 0.25% trypsin, and seeded into a 6-well plate with the density of  $1 \times 10^5$ . Cell transfection was performed by Lipofectamine<sup>®</sup> 2000 reagent (Invitrogen; Thermo Fisher Scientific, Inc.) according to the manufacture's introduction. Then the cell medium was cultured at 37°C with 5% CO<sub>2</sub>. 48h later, the cells were collected, and the relative expression level of the target genes were detected using qRT-PCR method to estimate the transfection efficacy.

### *Cell proliferation*

The proliferation ability of the cells was estimated using MTT assay. 48h after cell transfection, the cells were seeded to the 96-well plate ( $2 \times 10^4$  cells/well), then the cells were kept in an incubator containing 5% CO<sub>2</sub> at 37°C. Then, 50μL MTT (5mg/mL) was added to cell medium at each detected time point, including culturing for 0h, 24h, 48h and 72h. The cells were incubated with MTT for 4h, and then the absorbance at 490 nm was read with a Microplate Reader (TECAN, Salzburg, Austria).

### *Cell motility*

The cell motility was estimated by transwell assay (8.0 μm pore size, Costar, Shanghai, China). The lower chamber contained 500μL RPMI-1640 medium with 10% FBS, while 200μL serum-free RPMI-1640 medium was added to the upper chamber. For cell invasion, the upper chamber was coated with Matrigel (Corning Glass Works, Corning, N.Y., USA). 200μL cell suspension solution ( $5 \times 10^4$ /mL) was seeded to the upper chamber, and then the chamber was cultured at 37°C with 5% CO<sub>2</sub>. 48h later, the lower chamber was stained by crystal violet, and the cells were numbered using an inverted microscope (IX31; Olympus Corporation, Tokyo, Japan). Five random files were selected.

Each test was repeated three times.

### *Western blot*

In our study, western blot assay was performed for protein analysis. The procedures were carried out according to the standards. In brief, the protein samples were isolated from the cultured cells using RIPA Lysis and Extraction Buffer (Thermo Scientific, Waltham, MA, USA), and quantified by BCA Protein Assay Kit (Thermo Scientific, Waltham, MA, USA). Next, the same volume of protein specimens were loaded to 10% SDS-PAGE. The proteins were transfected to a polyvinylidene fluoride membrane (PVDF) (0.45  $\mu$ m pore size; EMD Millipore, Billerica, MA, USA) under 10mA for 40min. Then, the membranes were blocked with 5% skim milk powder at room temperature for 2 h. Subsequently, the membranes were included with the primary specific antibodies for overnight at 4°C, including anti-*PTEN* antibody (dilution, 1:1,000; cat. No. ab321991, Abcam), anti-p-AKT antibody (dilution, 1:1,000; cat. No. ab38449, Abcam), AKT antibody (dilution, 1: 2,000; cat. No. ab28422, Abcam), GSK3 $\beta$  antibody (dilution, 1:1,000; cat. No. ab93926, Abcam), p-GSK3 $\beta$  antibody (dilution, 1:1,000; cat. No. ab75745, Abcam). GAPDH was employed as internal control, and the primary GAPDH antibody was bought from Sigma-Aldrich (Germany, dilution, 1:500; cat. No. SAB4300645-100UG). Then, the membranes were incubated with the secondary anti-rabbit IgG antibody (dilution, 1:2,000; cat. No. ab6709; Abcam) for 2 h at room temperature. The results were analyzed by the Chemi Genius gel imaging system.

### *Luciferase reporter assay*

The bioinformatic analysis demonstrated that *miR-367* could bind to the 3'UTR of *PTEN* gene. Thus, luciferase reporter assay was performed to confirm whether *PTEN* was a potential target of *miR-367* in HCC. The 3'UTR of *PTEN* containing the binding site of *miR-367* (*PTEN*-wt), as well as the mutated region without the binding site of *miR-367* (*PTEN*-mt) was amplified through PCR method. Then the amplified fragments were inserted into firefly luciferase reporter vector pGL3. Subsequently, the HepG2 cells were co-transfected by *PTEN*-wt or *PTEN*-mt and *miR-367* mimic or mimic NC. 48h later, the luciferase activity of the cells was measured using Dual-Luciferase Reporter Assay System (Promega Corporation).

### *Statistical analysis*

All the data calculation was finished using SPSS 18.0 software (SPSS, Inc., Chicago, IL, USA). The continuous data were shown as mean  $\pm$  standard deviation (SD), and their comparisons between two groups were performed by student's t test. Chi-square test was used to estimate the association of *miR-367* expression with clinical characteristics of HCC patients. All the tests were two-tailed, and *P* values less than 0.05 predicted the statistical significance of the results.

## **Results**

### *Baseline characteristics of the study subjects*

In our study, 126 patients who were pathologically diagnosed with HCC were included. There were 76 males (60.32%) and 50 females (39.58%), and their average age was  $58.76 \pm 12.78$  years. 68 (53.97%) patients had smoking history, and 67 patients (53.17%) exhibited tumor size more than 3cm. Lymph node metastasis was observed in 48 patients (38.10%). According to Tumor Node Metastasis (TNM) staging system, 69 patients were confirmed with stages I-II, while 57 (45.24%) cases were diagnosed with stages III-IV. The baseline characteristics of the patients were summarized in **Table 1**.

### *Up-regulation of miR-367 in HCC tissues and cells*

The expression patterns of *miR-367* were detected in HCC tissues and cells. As shown in **Figure 1**, the levels of *miR-367* were significantly higher in HCC tissues (**Figure 1A**) and cell lines (**Figure 1B**) than that in the non-cancerous specimens ( $P < 0.001$ ).

### *Relationship between miR-367 expression and clinical characteristics of HCC patients*

The included patients were divided into high expression group ( $n=58$ ) and low expression group ( $n=68$ ) based on their mean expression levels of *miR-367* in HCC tissue samples. Chi-square test was performed to estimate the association of *miR-367* with clinical characteristics of HCC patients. The results demonstrated that the expression of *miR-367* showed positive association with tumor size ( $P=0.005$ ), lymph node metastasis ( $P=0.004$ ), and TNM stage ( $P < 0.001$ ). Meanwhile, the expression of *miR-367* had no significant association with patients' age ( $P=0.734$ ), gender ( $P=0.069$ ), or

smoking history ( $P=0.333$ ) (**Table 1**).

#### *Effects of cell transfection on expression of miR-367 in HepG2 cells*

To estimate the functional roles of *miR-367* in HCC, the *miR-367* mimic and *miR-367* inhibitor were designed in our study. QRT-PCR method was used to detect the expression of *miR-367* in the transfected cells. The results indicated that compared to the controls, the transfection of *miR-367* mimic could obviously enhance the expression of *miR-367* in HepG2 cells ( $P<0.01$ ), while *miR-367* inhibitor transfection might reduce *miR-367* expression ( $P<0.001$ ) (**Figure 2**).

#### *MiR-367 could promote HCC cell proliferation, migration and invasion*

The biological behaviors of the transfected cells were detected. MTT assay demonstrated that the transfection of *miR-367* mimic could enhance the proliferation ability of HepG2 cells ( $P<0.01$ ), while the inhibition of *miR-367* obviously suppressed cell proliferation ( $P<0.01$ ) (**Figure 3A**). Transwell assay demonstrated that the migration and invasion abilities of the cells transfected by *miR-367* mimic were significantly enhanced, while the transfection of *miR-367* inhibitor could inhibit cell motility ( $P<0.01$ ) (**Figure 3B and C**).

#### *MiR-367 targeted PTEN in HCC*

Bioinformatics analysis revealed that *miR-367* could bind to 3'UTR (position 420-430) of *PTEN* (**Figure 4A**). Luciferase reporter assay demonstrated that the luciferase activity of the cells co-transfected by *PTEN*-wt and *miR-367* mimic was significantly decreased compared to the co-transfection of *PTEN*-wt and mimic NC ( $P<0.01$ ). However, the co-transfection of *PTEN*-mt and *miR-367* mimic had no significant effects on luciferase activity, compared to the controls ( $P>0.05$ ) (**Figure 4B**). The results suggested that *miR-367* could bind to the 3' UTR of *PTEN* gene.

QRT-PCR method was performed to detect the relative expression of *PTEN* mRNA HCC cells. We found that the expression of *PTEN* mRNA was lower in HepG2 cells than that in the normal hepatic cells ( $P<0.01$ ) (**Figure 5A**). Moreover, the knockdown of *miR-367* could significantly enhance the expression of *PTEN* ( $P<0.001$ ) (**Figure 5B**). However, the transfection of over-expression *PTEN* vector had no obvious influences on expression of *miR-367* ( $P>0.05$ ) (**Figure 5C**). *PTEN* might be located at the down-stream of *miR-367* in HCC.



### *MiR-367 activated PI3K/AKT signaling pathway*

It had been reported that *PTEN* might be a negative switch of PI3K/AKT signaling pathway [20]. Thus, we hypothesized that *miR-367* might influence PI3K/AKT signaling pathway. Western blot analysis demonstrated that the expression of p-AKT and p-GSK3 $\beta$  was significantly increased after the transfection of *miR-367* mimic, while their expression exhibited decreased trend with the inhibition of *miR-367* ( $P<0.05$ ) (**Figure 6**). Meanwhile, *miR-367* expression had no significant effects on expression of AKT and GSK3 $\beta$  ( $P>0.05$  for all). All the data revealed that *miR-367* might activate the PI3K/AKT signaling pathway.

### *MiR-367 activated PI3K/AKT pathway through inhibiting PTEN, thus contributing to malignant progression of HCC*

In order to explore the molecular mechanisms underlying the functional roles of *miR-367* in progression of HCC, the HCC cells were co-transfected by *miR-367* inhibitor and si-*PTEN*. The cells transfected by *miR-367* inhibitor served as internal control. Western blot analysis demonstrated that the expression of p-AKT and p-GSK3 $\beta$  was significantly enhanced after the co-transfection of *miR-367* inhibitor and si-*PTEN* ( $P<0.01$ ) (**Figure 7**). *MiR-367* might activate PI3K/AKT signaling pathway through suppressing *PTEN* expression in HCC.

In addition, we also found that the cell proliferation, migration and invasion abilities of the cells co-transfected with *miR-367* inhibitor and si-*PTEN* were significantly enhanced, compared to the controls ( $P<0.05$  for all) (**Figure 8**). *PTEN* might reverse the function of *miR-367* in HCC. Therefore, *miR-367* promoted PI3K/AKT signaling pathway through targeting *PTEN*, thus contributing to malignant progression of HCC.

## **Discussion**

Accumulating evidences have demonstrated that miRNAs play important roles in cancer through regulating gene expression. The dysregulation of miRNAs may alter multiple cellular signaling pathways, thus contributing to human diseases, like cancer [21]. In tumorigenesis, miRNA could serve as tumor suppressors or oncogenes. In HCC, various miRNAs have been confirmed. For

example, let-7b could promote HCC cell proliferation through activating Wnt/ $\beta$ -catenin signaling pathway, which might be a potential oncogene in HCC [22]. MiR-23c reduced the expression of ERBB2IP, thus suppressing the tumorigenesis of HCC, and its down-regulation predicted poor prognosis for the patients [23]. MiRNAs have the capacity to act as indicators and therapeutic targets for HCC. To explore the functional roles of miRNA in progression of HCC may provide new insight into the pathogenesis of the cancer.

In current study, we investigated the functional roles of *miR-367* in HCC. We found that the expression of *miR-367* was significantly increased in HCC tissues and cells, compared to non-cancerous specimens. Moreover, the up-regulation of *miR-367* was closely correlated with large tumor size, positive lymph node metastasis, and advanced TNM stage. The knockdown of *miR-367* might suppress HCC cell proliferation, migration and invasion in vitro. All the data revealed that *miR-367* might act as an oncogene in HCC, and its over-expression enhanced malignant biological behaviors of HCC cells, thus contributing to malignant cancer progression. The conclusion was consistent with the previous study. Meng et al. reported that the expression level of *miR-367* was positively correlated with malignant proliferation and invasion of HCC cells [24]. Up-regulation of *miR-367* predicted aggressive HCC progression, and its knockdown could suppress the malignant behaviors of the cancer cells that *miR-367* might be a potential therapeutic target for HCC.

Despite lack of protein encoding ability, miRNAs can bind to the 3'UTR of their targeted mRNAs, thus regulating gene expression. MiRNAs take part in tumorigenesis through regulating the expression of cancer-related genes. In order to explore the molecular mechanisms of *miR-367* in progression of HCC, we studied the potential targets of *miR-367* in HCC. The bioinformatics analysis demonstrated that *miR-367* could bind to the 3'UTR of *PTEN* gene. The hypothesis was confirmed by the luciferase reporter assay. Moreover, the expression of *PTEN* was negatively correlated with *miR-367* level, and the regulation of *PTEN* level had no significant effects on expression of *miR-367*. Thus, we calculated that *miR-367* targeted *PTEN* in HCC, and *PTEN* was located at the down-stream of *miR-367*. Meng et al. reported that *miR-367* could negatively regulate *PTEN* in HCC [24]. Their study supported our results. However, Xu et al. suggested that *miR-367* might bind to 3'UTR of MDM2, thus contributing to metastasis of HCC [25]. In addition, *miR-367* might target Rab23 in gastric cancer [26], and regulate the expression of MTA3 in renal cell carcinoma [18]. In tumorigenesis, *miR-367* might target multiple genes, thus taking part in various

cellular processes.

Several published articles have demonstrated that *PTEN* was a negative switch of PI3K/AKT signaling pathway [20, 27, 28]. Furthermore, we confirmed that *miR-367* could target *PTEN* in HCC. Therefore, we hypothesized that *miR-367* might influence PI3K/AKT activity through targeting *PTEN*. Western blot analysis indicated that the levels of p-AKT and p-GSK3 $\beta$  were positively correlated with *miR-367* expression. *miR-367* could activate PI3K/AKT pathway, and its down-regulation might lead to the inactivation of the pathway. Additionally, *PTEN* hold the ability to reverse the function of *miR-367* in HCC. Therefore, we calculated that *miR-367* activated PI3K/AKT signaling pathway through suppressing the expression of *PTEN*, thus contributing to malignant progression of HCC.

Despite of the encouraging results, several limitations in current study should be stated. First, the sample size was relatively small that reduced the statistical power of our results. Second, the animal experiments were not designed to verify our conclusion. In addition, *miR-367* might take part in progression of HCC through multiple targets or signaling pathways. In our study, we only proved that *miR-367* promoted HCC progression through *PTEN*/PI3K/AKT axis. Therefore, further researches will be required to verify and improve our results, including the comparison of p-AKT and p-GSK3 $\beta$  expression levels between HCC cells and normal hepatic cells.

In conclusion, the elevated expression of *miR-367* predicts aggressive disease progression for HCC patients. *miR-367* activates PI3K/AKT pathway through negatively regulating *PTEN*, thus contributing to malignant progression of HCC.

## Declaration

This study was supported by the Ethics Committee of Hunan Provincial Tumor Hospital and also has been carried out in accordance with the World Medical Association Declaration of Helsinki.

The subjects had been informed the objective. Certainly, written consents were signed by every subject in this study.

## Author Contributions

All authors have contributed in the design, analysis, and drafting and approval of the final

manuscript. All authors have approved the final version of the manuscript.

## **Funding**

None.

## **Acknowledgement**

None.

## References

- [1] Siegel RL, Miller KD and Jemal A. Cancer Statistics, 2017. *CA Cancer J Clin* 2017; 67: 7-30.
- [2] Raihan R, Azzeri A, F HS and Mohamed R. Hepatocellular Carcinoma in Malaysia and Its Changing Trend. *Euroasian J Hepatogastroenterol* 2018; 8: 54-56.
- [3] Clark T, Maximin S, Meier J, Pokharel S and Bhargava P. Hepatocellular Carcinoma: Review of Epidemiology, Screening, Imaging Diagnosis, Response Assessment, and Treatment. *Curr Probl Diagn Radiol* 2015; 44: 479-486.
- [4] Pinter M and Peck-Radosavljevic M. Review article: systemic treatment of hepatocellular carcinoma. *Aliment Pharmacol Ther* 2018; 48: 598-609.
- [5] Yoo GS, Yu JI and Park HC. Proton therapy for hepatocellular carcinoma: Current knowledges and future perspectives. *World J Gastroenterol* 2018; 24: 3090-3100.
- [6] Singh AK, Kumar R and Pandey AK. Hepatocellular Carcinoma: Causes, Mechanism of Progression and Biomarkers. *Curr Chem Genom Transl Med* 2018; 12: 9-26.
- [7] Tang A, Hallouch O, Chernyak V, Kamaya A and Sirlin CB. Epidemiology of hepatocellular carcinoma: target population for surveillance and diagnosis. *Abdom Radiol (NY)* 2018; 43: 13-25.
- [8] Bruix J, Gores GJ and Mazzaferro V. Hepatocellular carcinoma: clinical frontiers and perspectives. *Gut* 2014; 63: 844-855.
- [9] Zakharia K, Luther CA, Alsabbak H and Roberts LR. Hepatocellular carcinoma: Epidemiology, pathogenesis and surveillance - implications for sub-Saharan Africa. *S Afr Med J* 2018; 108: 35-40.
- [10] Rong D, Tang W, Li Z, Zhou J, Shi J, Wang H and Cao H. Novel insights into circular RNAs in clinical application of carcinomas. *Onco Targets Ther* 2017; 10: 2183-2188.
- [11] Qu S, Yang X, Li X, Wang J, Gao Y, Shang R, Sun W, Dou K and Li H. Circular RNA: A new star of noncoding RNAs. *Cancer Lett* 2015; 365: 141-148.
- [12] Dong H, Lei J, Ding L, Wen Y, Ju H and Zhang X. MicroRNA: function, detection, and bioanalysis. *Chem Rev* 2013; 113: 6207-6233.
- [13] Pal AS and Kasinski AL. Animal Models to Study MicroRNA Function. *Adv Cancer Res* 2017; 135: 53-118.

- [14] Hayes J, Peruzzi PP and Lawler S. MicroRNAs in cancer: biomarkers, functions and therapy. *Trends Mol Med* 2014; 20: 460-469.
- [15] Xu J, Wu W, Wang J, Huang C, Wen W, Zhao F, Xu X, Pan X, Wang W, Zhu Q and Chen L. miR-367 promotes the proliferation and invasion of non-small cell lung cancer via targeting FBXW7. *Oncol Rep* 2017; 37: 1052-1058.
- [16] Ling JW, Lu PR, Zhang YB, Jiang S and Zhang ZC. miR-367 promotes uveal melanoma cell proliferation and migration by regulating PTEN. *Genet Mol Res* 2017; 16:
- [17] Cai W, Jiang H, Yu Y, Xu Y, Zuo W, Wang S and Su Z. miR-367 regulation of DOC-2/DAB2 interactive protein promotes proliferation, migration and invasion of osteosarcoma cells. *Biomed Pharmacother* 2017; 95: 120-128.
- [18] Ding D, Zhang Y, Wen L, Fu J, Bai X, Fan Y, Lin Y, Dai H, Li Q and An R. MiR-367 regulates cell proliferation and metastasis by targeting metastasis-associated protein 3 (MTA3) in clear-cell renal cell carcinoma. *Oncotarget* 2017; 8: 63084-63095.
- [19] Wang Y, Liu Z, Yao B, Li Q, Wang L, Wang C, Dou C, Xu M, Liu Q and Tu K. Long non-coding RNA CASC2 suppresses epithelial-mesenchymal transition of hepatocellular carcinoma cells through CASC2/miR-367/FBXW7 axis. *Mol Cancer* 2017; 16: 123.
- [20] Worby CA and Dixon JE. Pten. *Annu Rev Biochem* 2014; 83: 641-669.
- [21] Hesse M and Arenz C. MicroRNA maturation and human disease. *Methods Mol Biol* 2014; 1095: 11-25.
- [22] Wang Y, Mo Y, Wang L, Su P and Xie Y. Let-7b contributes to hepatocellular cancer progression through Wnt/beta-catenin signaling. *Saudi J Biol Sci* 2018; 25: 953-958.
- [23] Zhang L, Wang Y, Wang L, Yin G, Li W, Xian Y, Yang W and Liu Q. miR-23c suppresses tumor growth of human hepatocellular carcinoma by attenuating ERBB2IP. *Biomed Pharmacother* 2018; 107: 424-432.
- [24] Meng X, Lu P and Fan Q. miR-367 promotes proliferation and invasion of hepatocellular carcinoma cells by negatively regulating PTEN. *Biochem Biophys Res Commun* 2016; 470: 187-191.
- [25] Xu J, Lin H, Li G, Sun Y, Chen J, Shi L, Cai X and Chang C. The miR-367-3p Increases Sorafenib Chemotherapy Efficacy to Suppress Hepatocellular Carcinoma Metastasis through Altering the Androgen Receptor Signals. *EBioMedicine* 2016; 12: 55-67.

- [26] Bin Z, Dedong H, Xiangjie F, Hongwei X and Qinghui Y. The microRNA-367 inhibits the invasion and metastasis of gastric cancer by directly repressing Rab23. *Genet Test Mol Biomarkers* 2015; 19: 69-74.
- [27] Tsai CY, Wu JCC, Fang C and Chang AYW. PTEN, a negative regulator of PI3K/Akt signaling, sustains brain stem cardiovascular regulation during mevinphos intoxication. *Neuropharmacology* 2017; 123: 175-185.
- [28] Xu W, Yang Z, Xie C, Zhu Y, Shu X, Zhang Z, Li N, Chai N, Zhang S, Wu K, Nie Y and Lu N. PTEN lipid phosphatase inactivation links the hippo and PI3K/Akt pathways to induce gastric tumorigenesis. *J Exp Clin Cancer Res* 2018; 37: 198.

## Figure legends

**Figure 1.** The expression of *miR-367* was obviously increased in HCC tissues (A) and cells (B), compared to the non-cancerous samples. Every experiment is triplicate. \*\*\*:  $P<0.001$

**Figure 2.** The levels of *miR-367* in the transfected cells. The transfection of *miR-367* mimic could significantly enhance the expression ability of *miR-367* in HepG2 cells, while *miR-367* inhibitor transfection inhibited the expression of *miR-367* in HCC cells. Every experiment is triplicate. \*\*\*:  $P<0.001$ , \*\*:  $P<0.01$

**Figure 3.** The transfection of *miR-367* mimic could enhance cell proliferation, migration and invasion, while the knockdown of *miR-367* inhibit cell proliferation, migration and invasion. Every experiment is triplicate. \*\*:  $P<0.01$

**Figure 4.** The direct target relationship predicted by StarBase v2.0 between *miR-367* and PTEN (A). The luciferase activity of the cells co-transfected by *PTEN*-wt and *miR-367* mimic was significantly decreased compared to the co-transfection of *PTEN*-wt and mimic NC (B). However, the co-transfection of *PTEN*-mt and *miR-367* mimic had no significant effects on luciferase activity, compared to the controls. Every experiment is triplicate. \*\*:  $P<0.01$

**Figure 5.** The levels of *PTEN* mRNA were significantly decreased in HepG2 cells compared to normal hepatic cells (A). The knockdown of *miR-367* could enhance *PTEN* expression in HepG2 cells (B). However, the enforced expression of *PTEN* in HepG2 cells had no remarkable effects on *miR-367* expression (C). Every experiment is triplicate. \*\*\*:  $P<0.001$ , \*\*:  $P<0.01$

**Figure 6.** The over-expression of *miR-367* could activate PI3K/AKT signaling pathway through promoting the levels of p-AKT and p-GSK3 $\beta$ , meanwhile, the knockdown of *miR-367* exerted the opposite effects. The expression of AKT and GSK3 $\beta$  had no significant association with *miR-367* level. Every experiment is triplicate. \*\*:  $P<0.01$ , \*:  $P<0.05$

**Figure 7.** Protein expressions in transfected HepG2 cells. Compared to *miR-367* inhibitor HepG2 cells, the HepG2 cells co-transfected by *miR-367* inhibitor and si-*PTEN* exerted increased expression of p-AKT and p-GSK3 $\beta$ , revealing the activation of PI3K/AKT pathway. The HCC cells transfected by si-*PTEN* served as control. Every experiment is triplicate. \*\*:  $P<0.01$ , \*:  $P<0.05$

**Figure 8.** The cell proliferation (A), migration (B) and invasion (C) abilities of the cells co-transfected with *miR-367* inhibitor and si-*PTEN* were significantly enhanced, compared to the controls. The cells transfected by *miR-367* inhibitor served as control. Every experiment is triplicate.



\*\*\*:  $P < 0.001$ , \*\*:  $P < 0.01$ , \*:  $P < 0.05$

**Table 1.** The association of *miR-367* expression with clinical characteristics of HCC patients

| Characteristics          | N<br>(n=126, %) | <i>miR-367</i> low expression<br>(n=68, %) | <i>miR-367</i> high expression<br>(n=58, %) | <i>P</i> values |
|--------------------------|-----------------|--------------------------------------------|---------------------------------------------|-----------------|
| Age (years)              |                 |                                            |                                             | 0.734           |
| ≥60                      | 74 (58.73)      | 39 (57.35)                                 | 35 (60.34)                                  |                 |
| <60                      | 52 (42.27)      | 29 (42.65)                                 | 23 (39.66)                                  |                 |
| Gender                   |                 |                                            |                                             | 0.069           |
| male                     | 76 (60.32)      | 46 (67.65)                                 | 30 (51.72)                                  |                 |
| female                   | 50 (39.68)      | 22 (32.35)                                 | 28 (48.29)                                  |                 |
| Smoking                  |                 |                                            |                                             | 0.333           |
| yes                      | 68 (53.97)      | 34 (50.00)                                 | 34 (58.63)                                  |                 |
| no                       | 58 (46.03)      | 34 (50.00)                                 | 24 (41.37)                                  |                 |
| Tumor size (cm)          |                 |                                            |                                             | 0.005           |
| ≤3                       | 67 (53.17)      | 44 (64.71)                                 | 23 (39.66)                                  |                 |
| >3                       | 59 (46.83)      | 24 (35.29)                                 | 35 (60.34)                                  |                 |
| Lymph node<br>metastasis |                 |                                            |                                             | 0.004           |
| yes                      | 48 (38.10)      | 18 (26.47)                                 | 30 (51.72)                                  |                 |
| no                       | 78 (61.90)      | 50 (73.53)                                 | 28 (48.28)                                  |                 |
| TNM stage                |                 |                                            |                                             | <0.001          |
| I-II                     | 69 (54.76)      | 48 (70.59)                                 | 21 (36.21)                                  |                 |
| III-IV                   | 57 (45.24)      | 20 (29.41)                                 | 37 (63.79)                                  |                 |

Notes: HCC: hepatocellular carcinoma; TNM: tumor node metastasis

# **A** Relative expression of *miR-367*

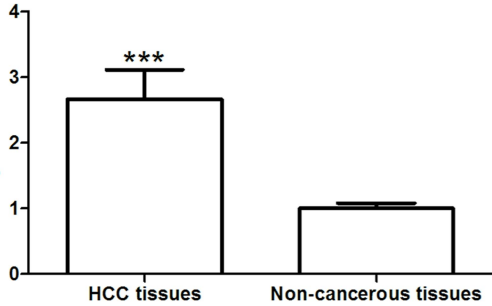

# **B**

## Relative expression of *miR-367*

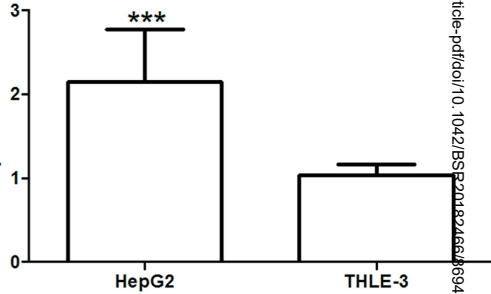

# Relative expreption of *miR*-367

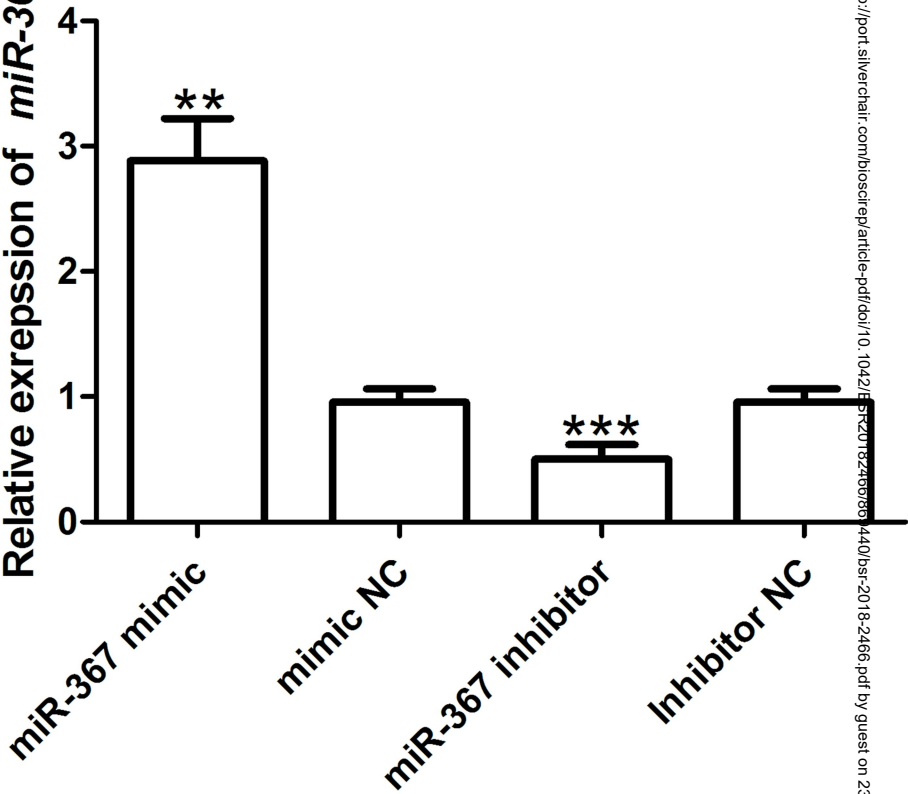

**A**

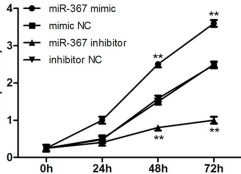

**B**

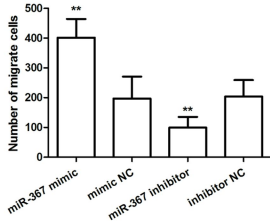

**C**

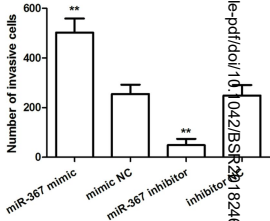

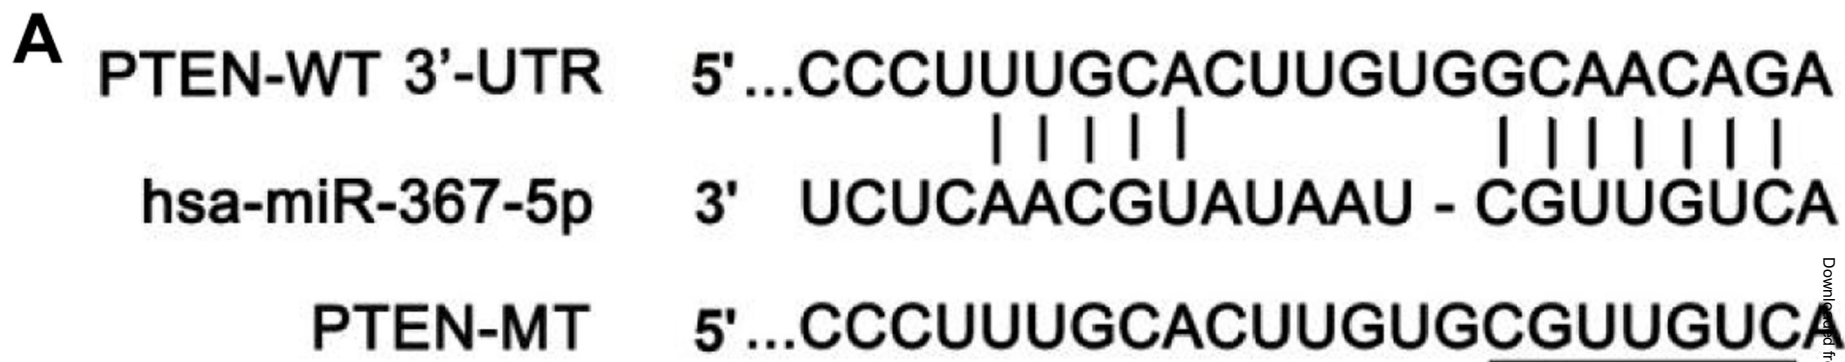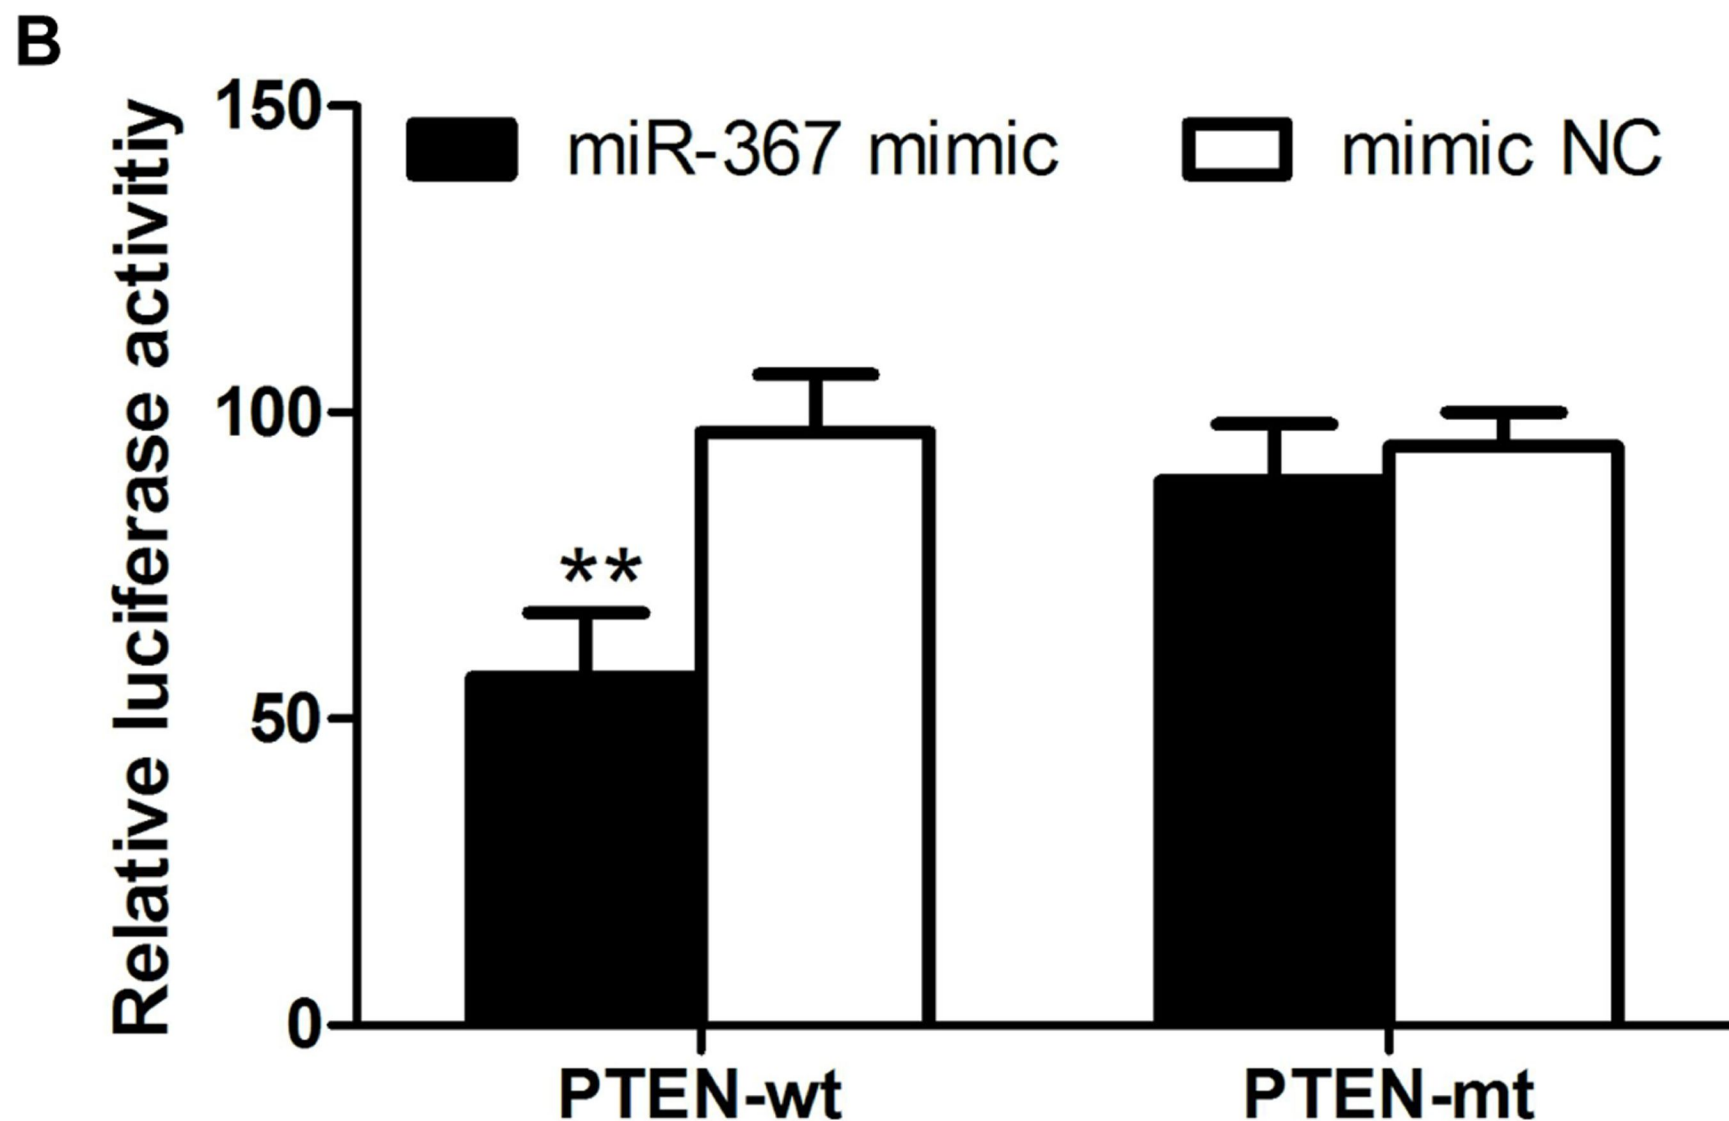

**A**

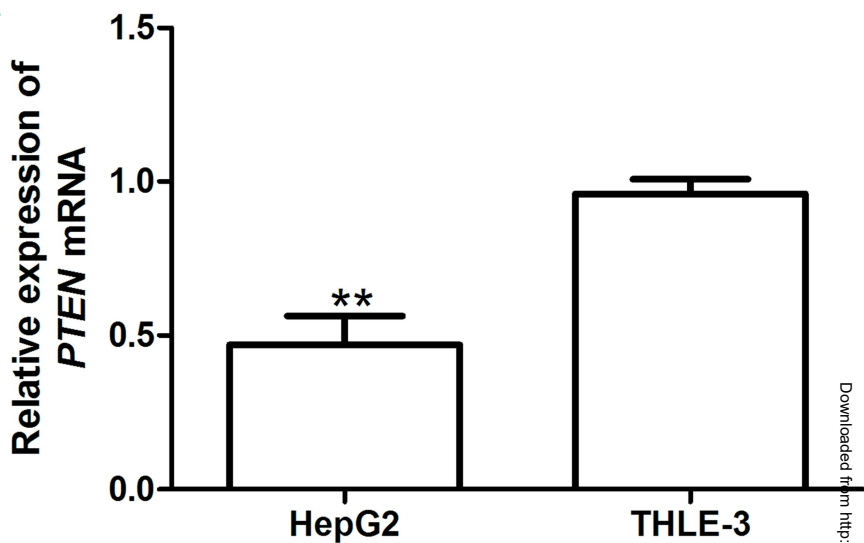

**B**

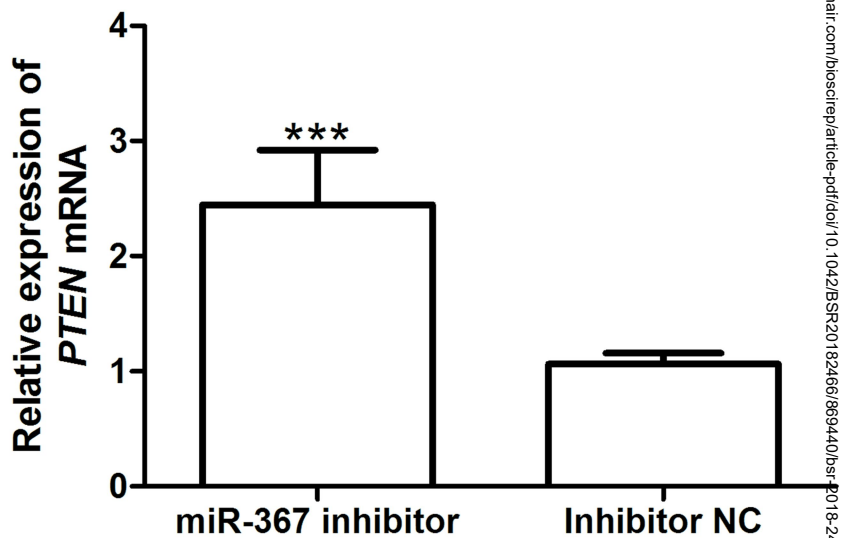

**C**

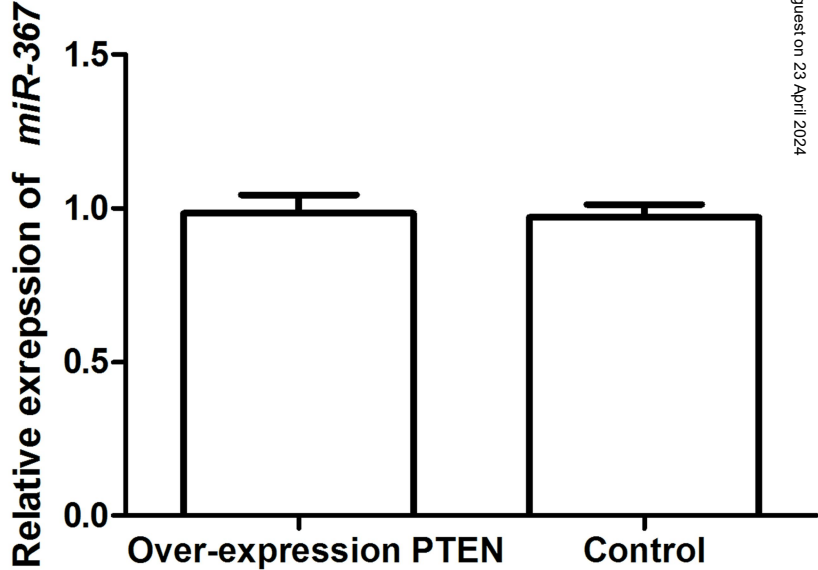

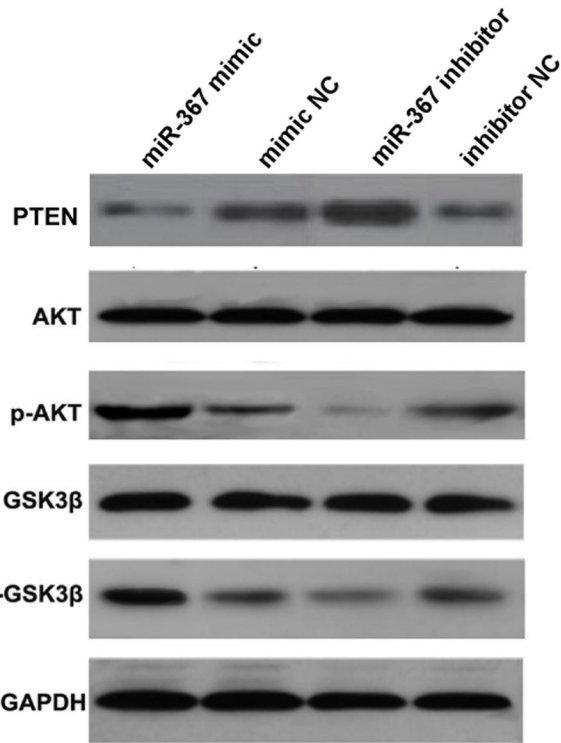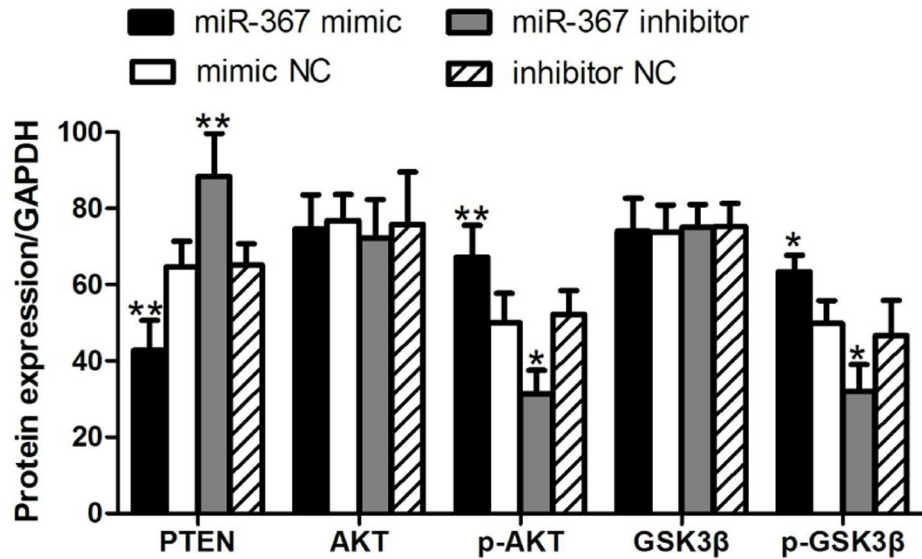



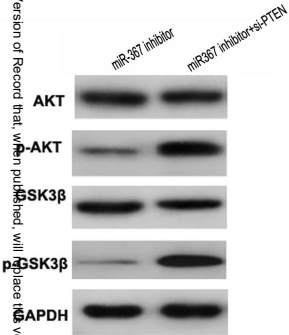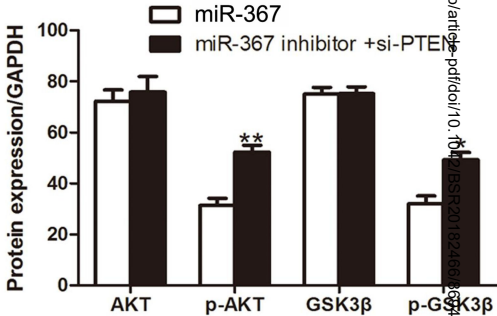

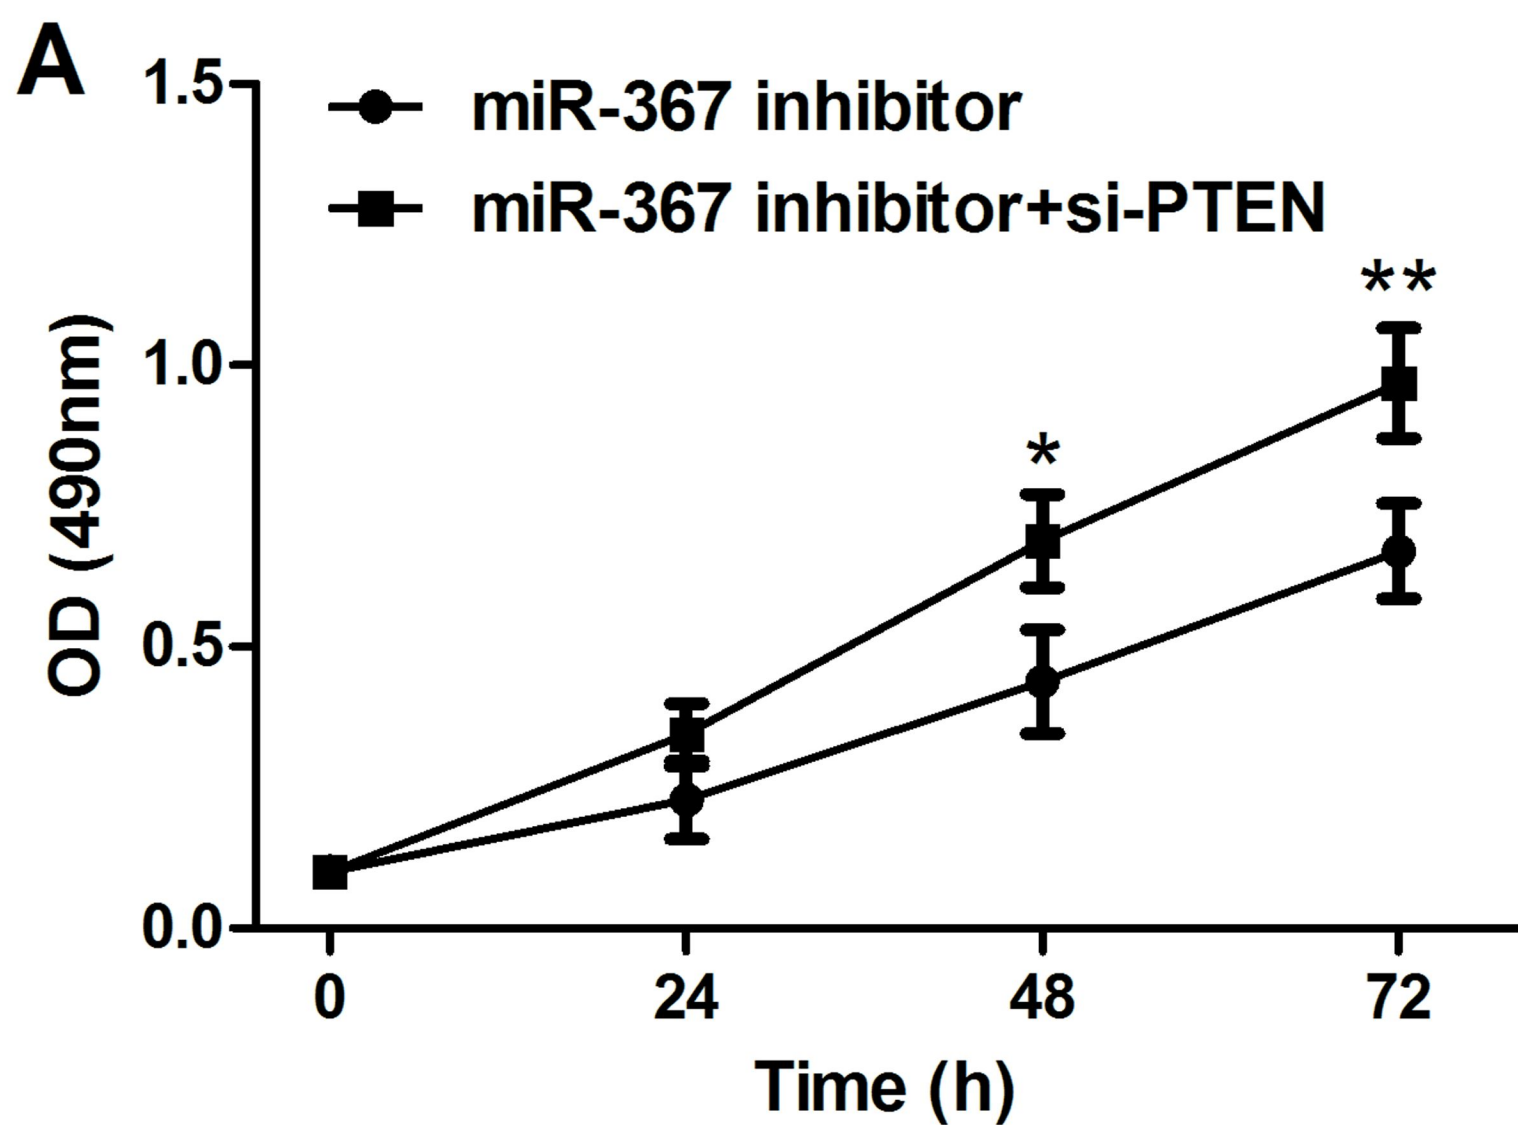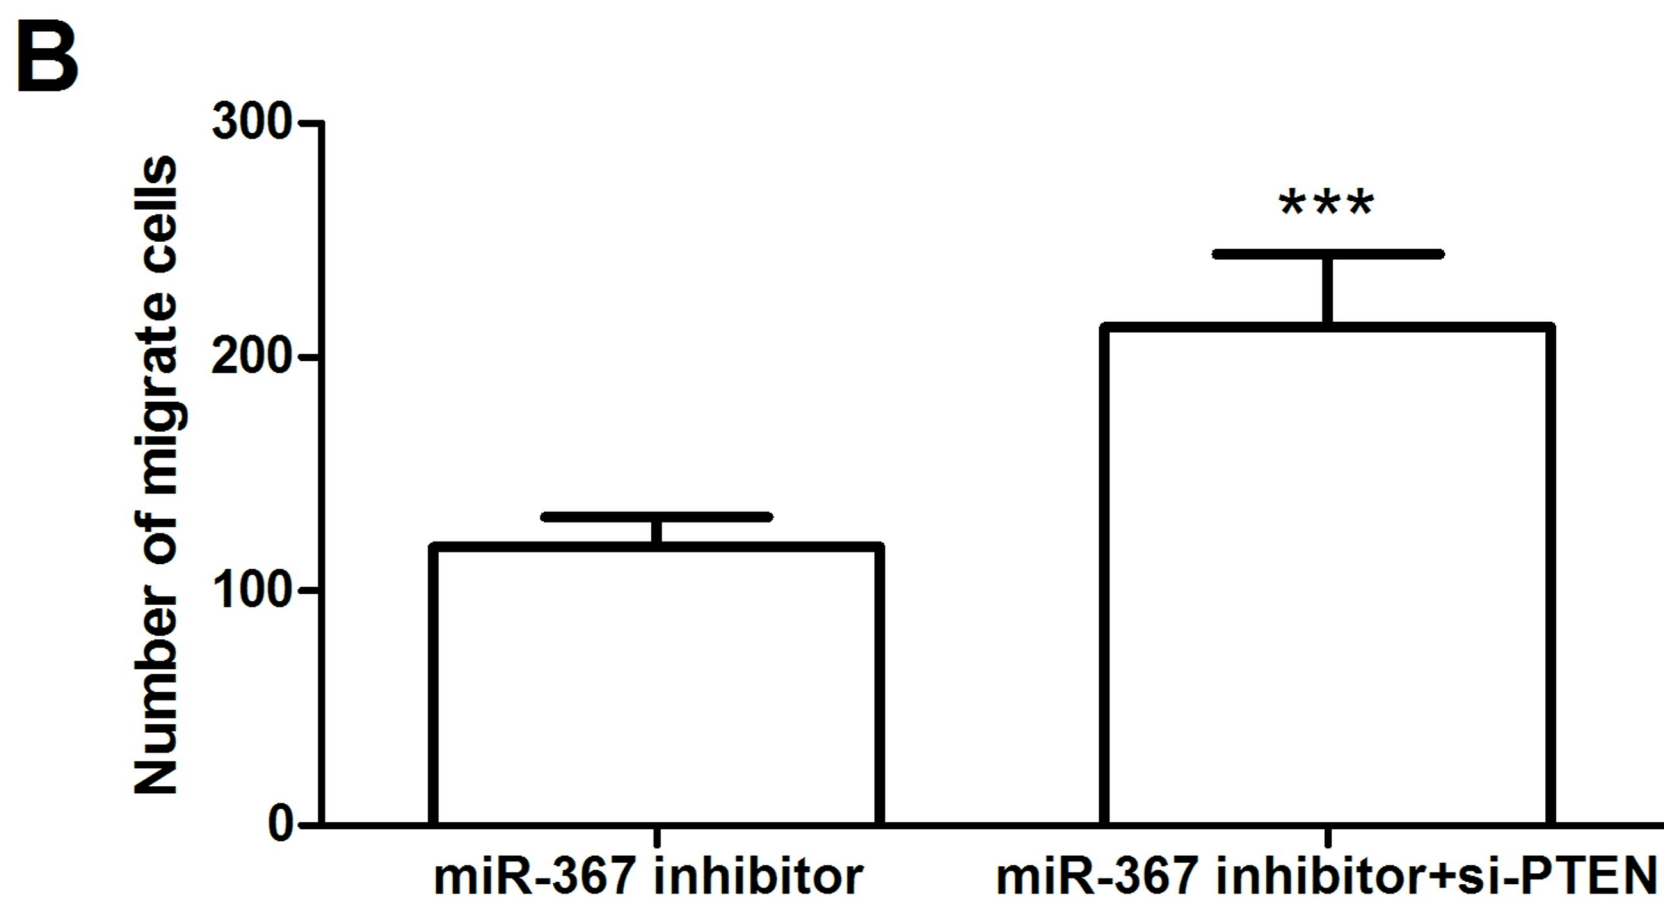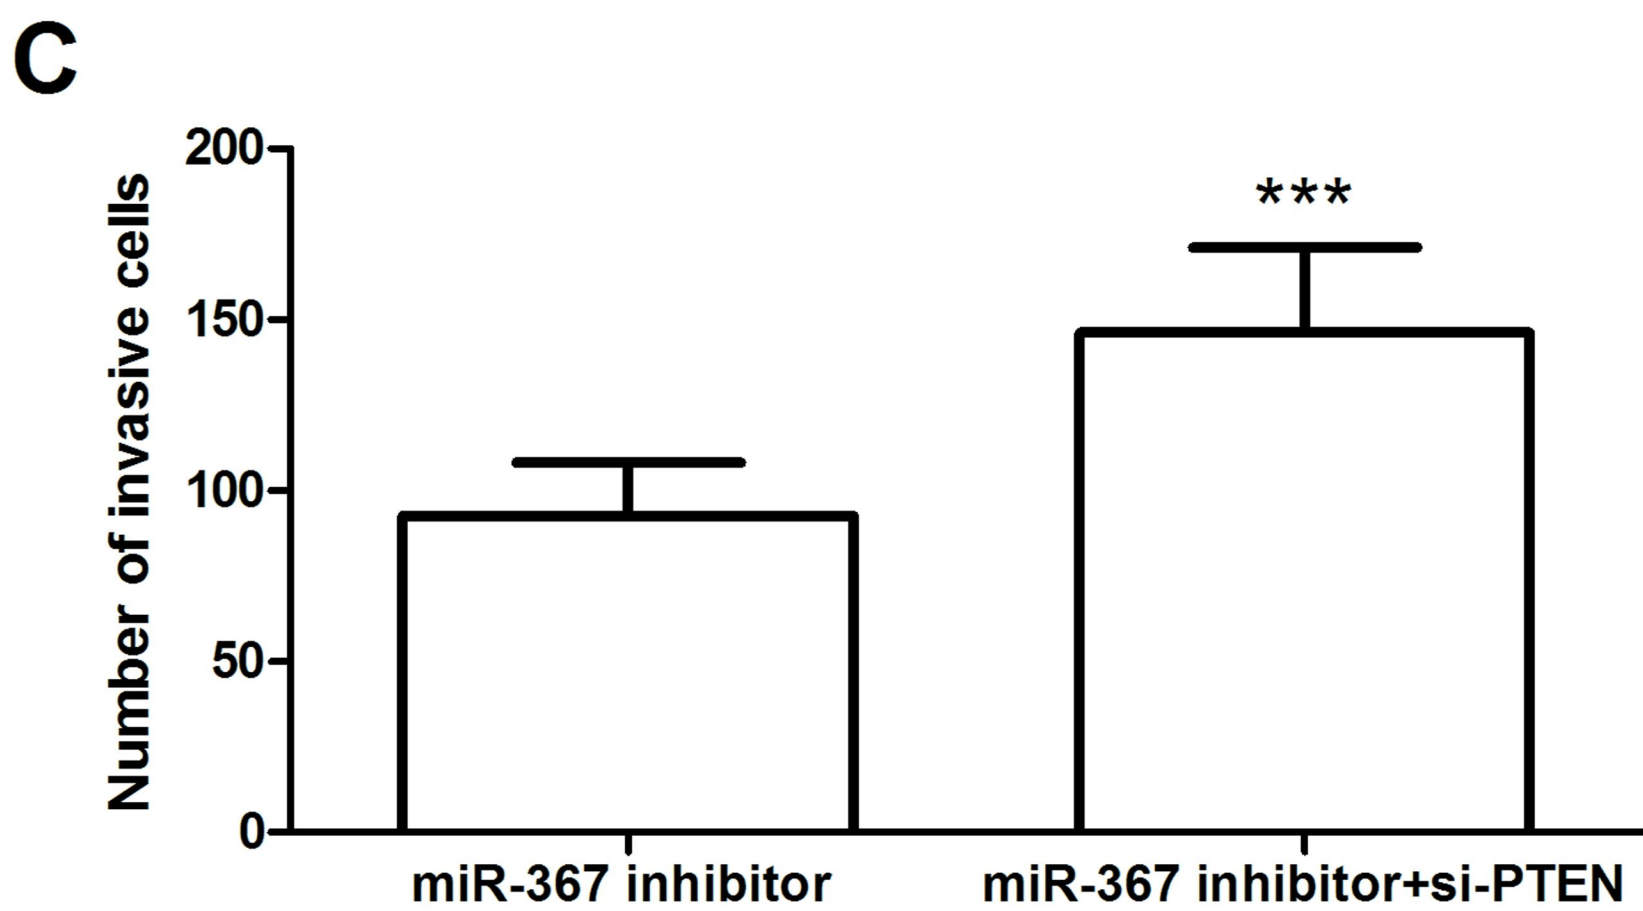

**Supplementary Table 1.** Sequences of new constructs.

| Names                | Sequences                                                                                   |
|----------------------|---------------------------------------------------------------------------------------------|
| MiR-367 mimic        | 5'-CCATTACTGTTGCTAATATGCAACTCTGTTGAATATAAAATTGGAATTGC<br>ACTTTAGCAATGGTGATGG-3'             |
| MiR-367 mimic NC     | 5'-CGCGATTGTAATCGTGAGCTTTTGTTCATGACATAAAATTGTCGGAATAA<br>CTTCTGTTGAGCATATAATA-3'            |
| miR-367 inhibitor    | 2'-O-methyl-5'-CCATTACTGTTGCTAATATGCAACTCTGTTGAATATAAAATT<br>GGAATTGCACTTTAGCAATGGTGATGG-3' |
| miR-367 inhibitor NC | 2'-O-methyl-5'-CGCGATTGTAATCGTGAGCTTTTGTTCATGACATAAAATTGT<br>CGGAAATCTTCTGTTGAGCATATAATA-3' |
| PTEN siRNA           | 5'-AACCCACCACAGCUAGAAC tt -3'<br>5'-AAGUUCUAGCUGUGGUGGG tt -3'                              |
| Control siRNA        | 5'-UUCUCCGAACGUGUCACGU tt -3'<br>5'-ACGUGACACGUUCGGAGA A tt -3'                             |
| Over-expression PTEN | 5'-CCGGAATTCATGGCCATGGCAACCAAAGG-3'<br>5'-CCCAAGCTTTCAGACTTTTGTAAATTTGTGTATGC-3'            |
